# Supplementary material
Source: Springer Nature journal article supplement (https://www.springermedizin.de/resource/supplementary/12889_2012_5594_MOESM8_ESM.pdf/9495740)

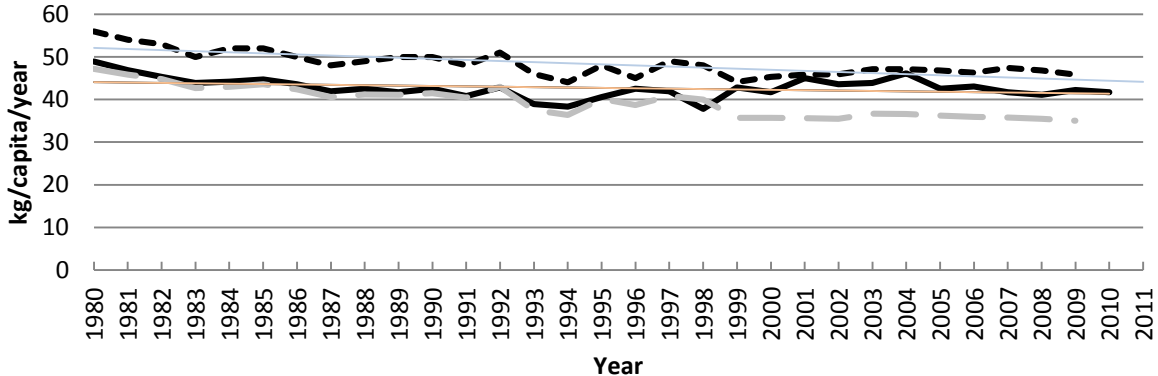

--- FAOstat: Sugars and Sweeteners

— GreenPool: Aparrent consumption

— FAOStat: Sugar, refined

Supplement: MOESM8 [file 9495740]
